# Supplementary material for: Diffusion tubes: a method for the mass culture of ctenophores and other pelagic marine invertebrates
Source: PeerJ. 2020 Apr 7;8:e8938. doi: 10.7717/peerj.8938 (PMC7147435; doi:10.7717/peerj.8938)
Supplement: Supplemental Information 1 — Three columns: the day post hatch the measurement was taken, the length as measured from ImageJ and the flow treatment that measurement came from. [file peerj-08-8938-s001.xlsx]

## Sheet: Sheet1
Day	Treatment	Length
2	LOW	162
2	LOW	160
2	LOW	170
2	LOW	146
2	LOW	158
2	LOW	143
2	LOW	181
2	LOW	159
2	LOW	164
2	LOW	159
2	LOW	163
2	LOW	158
2	LOW	153
2	LOW	156
9	LOW	142
9	LOW	239
9	LOW	168
9	LOW	145
9	LOW	193
9	LOW	177
9	LOW	208
9	LOW	166
9	LOW	158
9	LOW	159
9	LOW	197
9	LOW	168
9	LOW	183
9	LOW	163
9	LOW	195
9	LOW	119
9	LOW	143
9	LOW	145
9	LOW	69
16	LOW	173
16	LOW	193
16	LOW	134
16	LOW	172
16	LOW	127
16	LOW	227
16	LOW	203
16	LOW	200
16	LOW	155
16	LOW	187
16	LOW	150
16	LOW	158
16	LOW	158
16	LOW	167
16	LOW	176
16	LOW	167
16	LOW	166
16	LOW	229
16	LOW	159
23	LOW	249
23	LOW	258
23	LOW	225
23	LOW	218
23	LOW	182
23	LOW	186
23	LOW	201
23	LOW	261
23	LOW	150
23	LOW	169
23	LOW	195
23	LOW	147
23	LOW	209
23	LOW	180
23	LOW	235
23	LOW	228
23	LOW	184
23	LOW	214
23	LOW	287
23	LOW	193
23	LOW	189
23	LOW	171
30	LOW	441
30	LOW	366
30	LOW	315
30	LOW	464
30	LOW	380
30	LOW	456
30	LOW	564
30	LOW	211
30	LOW	221
30	LOW	310
30	LOW	742
30	LOW	703
30	LOW	829
30	LOW	323
30	LOW	318
30	LOW	656
30	LOW	674
30	LOW	333
35	LOW	608
35	LOW	493
35	LOW	644
35	LOW	1424
35	LOW	338
35	LOW	592
35	LOW	898
35	LOW	346
35	LOW	324
35	LOW	669
35	LOW	532
35	LOW	610
35	LOW	943
35	LOW	490
35	LOW	436
35	LOW	517
35	LOW	389
35	LOW	271
35	LOW	1197
35	LOW	749
35	LOW	391
35	LOW	909
35	LOW	708
35	LOW	446
35	LOW	458
35	LOW	328
35	LOW	497
35	LOW	493
35	LOW	662
35	LOW	351
35	LOW	537
2	MED	157
2	MED	161
2	MED	143
2	MED	157
2	MED	152
2	MED	132
2	MED	152
2	MED	163
2	MED	170
2	MED	165
2	MED	153
2	MED	161
2	MED	175
2	MED	154
2	MED	154
2	MED	160
9	MED	172
9	MED	159
9	MED	159
9	MED	188
9	MED	203
9	MED	165
9	MED	188
9	MED	191
9	MED	187
9	MED	183
9	MED	159
9	MED	190
9	MED	198
9	MED	147
9	MED	166
9	MED	170
9	MED	181
9	MED	205
9	MED	191
9	MED	162
9	MED	188
9	MED	186
9	MED	165
9	MED	179
16	MED	228
16	MED	222
16	MED	141
16	MED	121
16	MED	124
16	MED	147
16	MED	145
16	MED	239
16	MED	154
16	MED	203
16	MED	165
16	MED	201
16	MED	148
16	MED	156
16	MED	195
16	MED	192
16	MED	183
16	MED	192
16	MED	164
16	MED	115
16	MED	140
16	MED	178
16	MED	152
23	MED	231
23	MED	228
23	MED	226
23	MED	205
23	MED	199
23	MED	206
23	MED	169
23	MED	155
23	MED	182
23	MED	173
23	MED	164
23	MED	218
23	MED	168
23	MED	293
23	MED	116
23	MED	162
23	MED	176
23	MED	165
30	MED	478
30	MED	425
30	MED	371
30	MED	266
30	MED	262
30	MED	288
30	MED	294
30	MED	292
30	MED	354
30	MED	341
30	MED	261
30	MED	298
30	MED	331
30	MED	298
30	MED	261
30	MED	646
30	MED	329
30	MED	315
30	MED	242
30	MED	249
35	MED	372
35	MED	253
35	MED	328
35	MED	385
35	MED	284
35	MED	338
35	MED	420
35	MED	561
35	MED	271
35	MED	332
35	MED	196
35	MED	350
35	MED	464
35	MED	300
35	MED	313
35	MED	335
35	MED	248
35	MED	250
2	HIGH	168
2	HIGH	155
2	HIGH	148
2	HIGH	142
2	HIGH	141
2	HIGH	171
2	HIGH	158
2	HIGH	129
2	HIGH	149
2	HIGH	158
2	HIGH	163
2	HIGH	162
2	HIGH	141
2	HIGH	146
2	HIGH	153
2	HIGH	158
9	HIGH	179
9	HIGH	156
9	HIGH	180
9	HIGH	206
9	HIGH	172
9	HIGH	158
9	HIGH	154
9	HIGH	154
9	HIGH	123
9	HIGH	181
9	HIGH	126
9	HIGH	131
9	HIGH	197
9	HIGH	212
9	HIGH	181
9	HIGH	170
9	HIGH	146
9	HIGH	176
9	HIGH	174
9	HIGH	198
9	HIGH	153
9	HIGH	177
9	HIGH	157
9	HIGH	147
9	HIGH	139
9	HIGH	175
16	HIGH	236
16	HIGH	168
16	HIGH	191
16	HIGH	321
16	HIGH	157
16	HIGH	234
16	HIGH	133
16	HIGH	172
16	HIGH	196
16	HIGH	198
16	HIGH	198
16	HIGH	165
16	HIGH	195
16	HIGH	193
23	HIGH	223
23	HIGH	334
23	HIGH	196
23	HIGH	199
23	HIGH	170
23	HIGH	266
23	HIGH	191
23	HIGH	165
23	HIGH	181
23	HIGH	198
23	HIGH	197
23	HIGH	226
23	HIGH	211
23	HIGH	288
23	HIGH	173
30	HIGH	517
30	HIGH	511
30	HIGH	367
30	HIGH	475
30	HIGH	305
30	HIGH	425
30	HIGH	603
30	HIGH	459
30	HIGH	731
30	HIGH	414
30	HIGH	428
30	HIGH	337
30	HIGH	360
30	HIGH	488
30	HIGH	345
30	HIGH	432
30	HIGH	341
30	HIGH	395
30	HIGH	368
30	HIGH	422
30	HIGH	291
30	HIGH	315
35	HIGH	1178
35	HIGH	618
35	HIGH	1353
35	HIGH	1726
35	HIGH	946
35	HIGH	429
35	HIGH	841
35	HIGH	447
35	HIGH	675
35	HIGH	952
35	HIGH	1374
35	HIGH	1465
35	HIGH	308
35	HIGH	409
35	HIGH	436
35	HIGH	1644
35	HIGH	1212
35	HIGH	973
35	HIGH	1463
35	HIGH	1830
35	HIGH	308
35	HIGH	1644
35	HIGH	1756
35	HIGH	993
35	HIGH	990
35	HIGH	1629
